# Supplementary material for: Unprecedented copper(ii) mediated in situ formation of gem-diol binuclear complexes: a combined experimental and computational study
Source: Royal Society of Chemistry journal article supplement (doi:10.1039/c6ra20367a), 2016-01-01
Supplement: c6ra20367a1.pdf [file c6ra20367a1.pdf]

### Unprecedented copper(II) mediated in situ formation of *gem*-diol binuclear complexes: A combined experimental and computational study

Ram N. Patel<sup>\*a</sup>, Yogendra Pratap Singh<sup>a</sup>, Yogendra Singh<sup>a</sup>, R. J. Butcher<sup>b</sup>, Matthias Zeller<sup>c</sup>,

<sup>a</sup> Department of Chemistry, A. P. S. University, Rewa (M.P.) 486003 INDIA

<sup>b</sup> Department of Inorganic & Structural Chemistry, Howard University, Washington DC, 22031 USA

<sup>c</sup> Department of Chemistry, Youngstown State University, USA

#### supplementary information

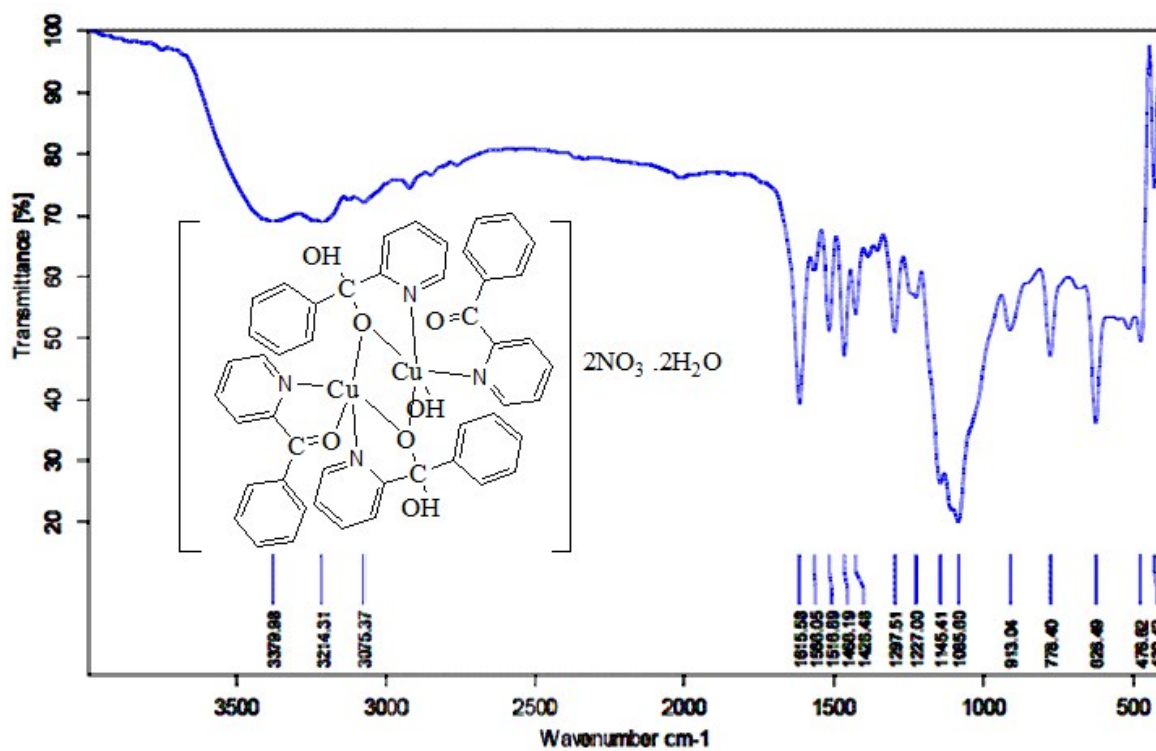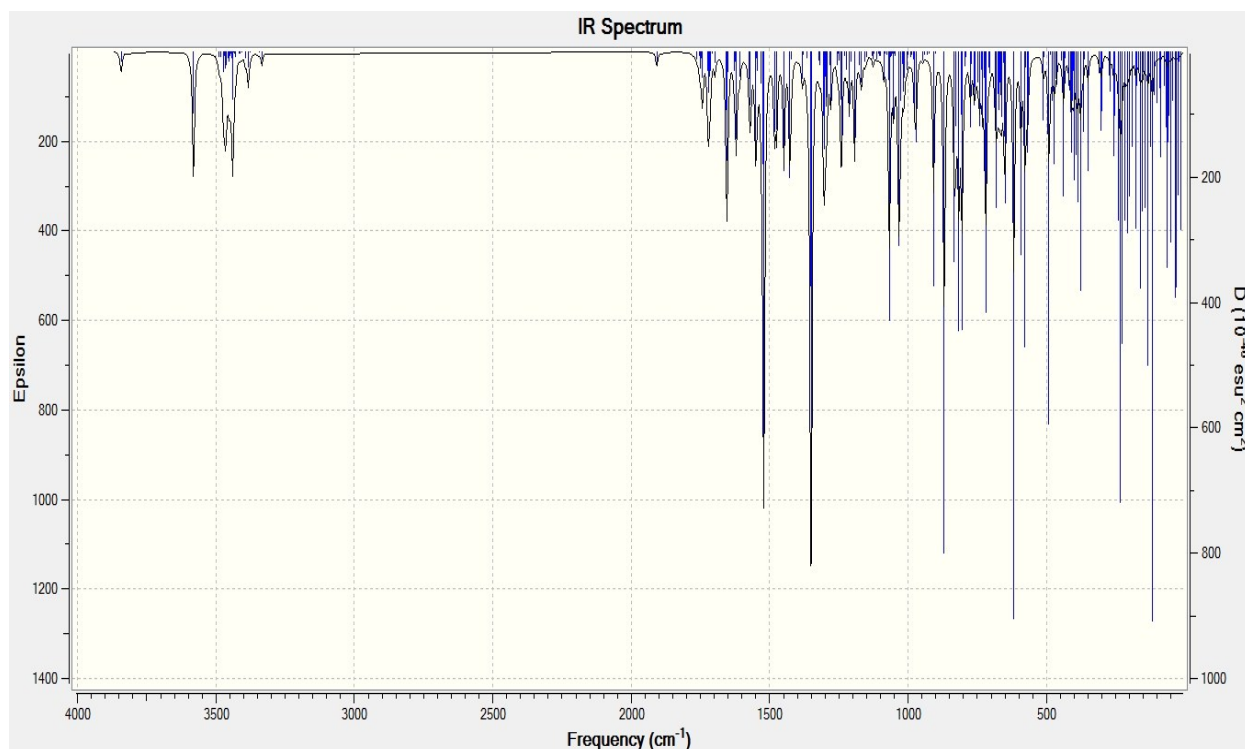

Fig. S1 FT-IR spectra of complex 1 Top: Experimental Bottom: Theoretical

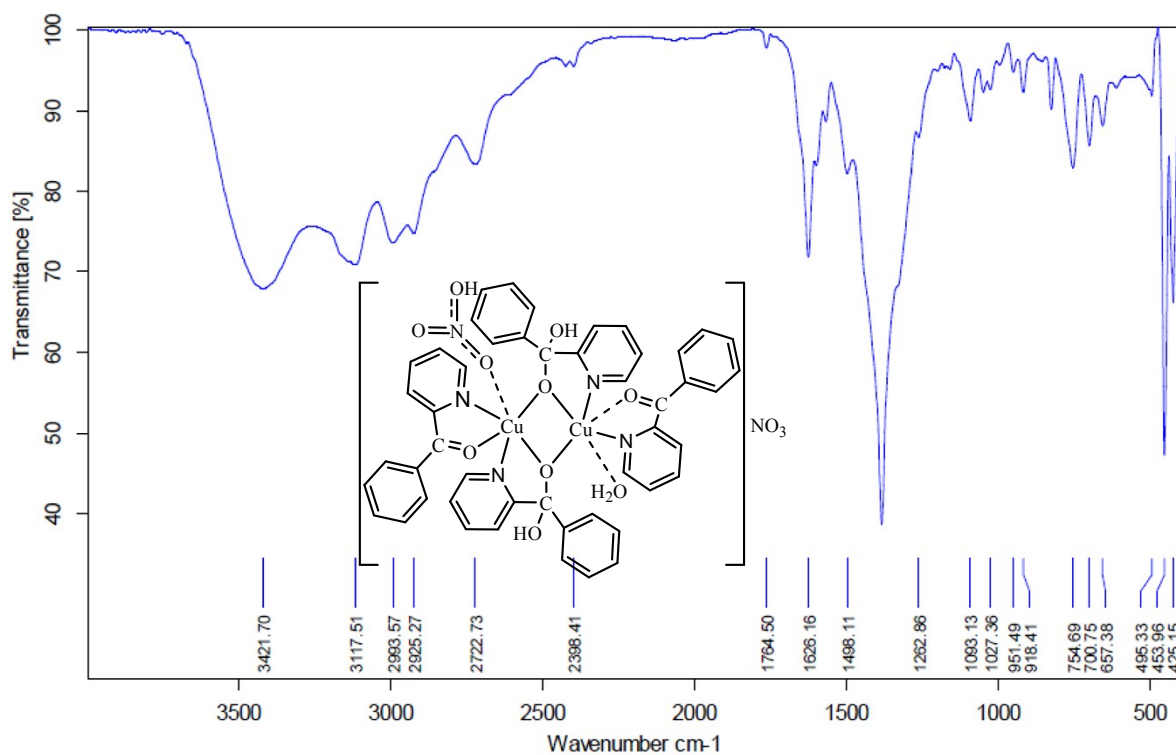

Fig. S2 FTIR spectra of complex 2.

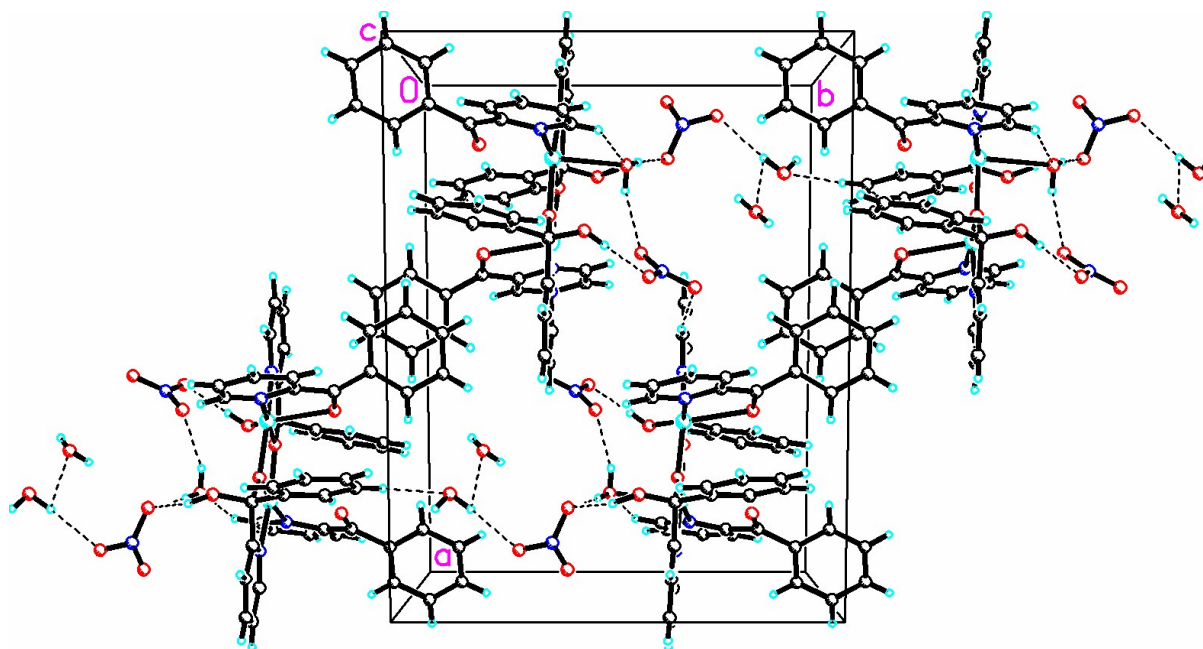

Fig. S3 Unit cell diagram with hydrogen bonding scheme of complex  $[\text{Cu}_2(\text{L}^1)_2(\text{HL}^2)_2(\text{H}_2\text{O})](\text{NO}_3)_2 \cdot 2\text{H}_2\text{O}$  1.

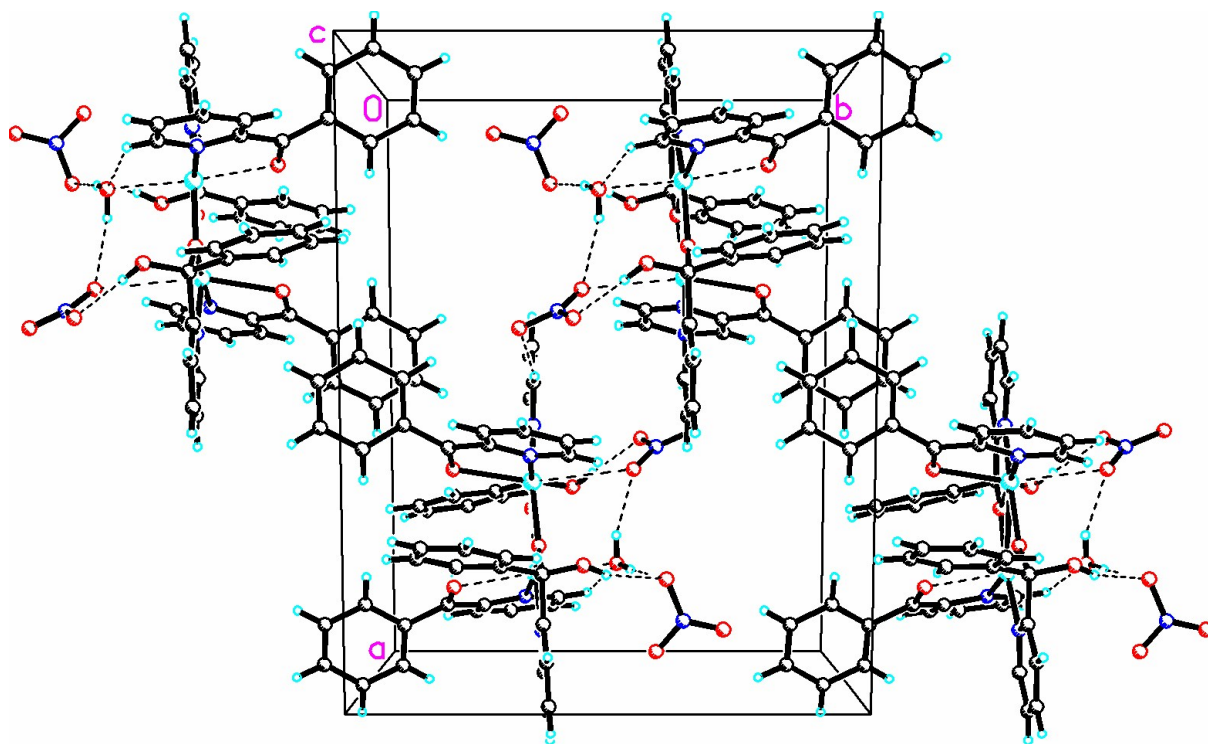

Fig. S4 Unit cell diagram with hydrogen bonding scheme of complex  $[\text{Cu}_2(\text{L}^1)_2(\text{HL}^2)_2](\text{NO}_3)_2 \cdot \text{H}_2\text{O} \cdot 2$ .

(a)

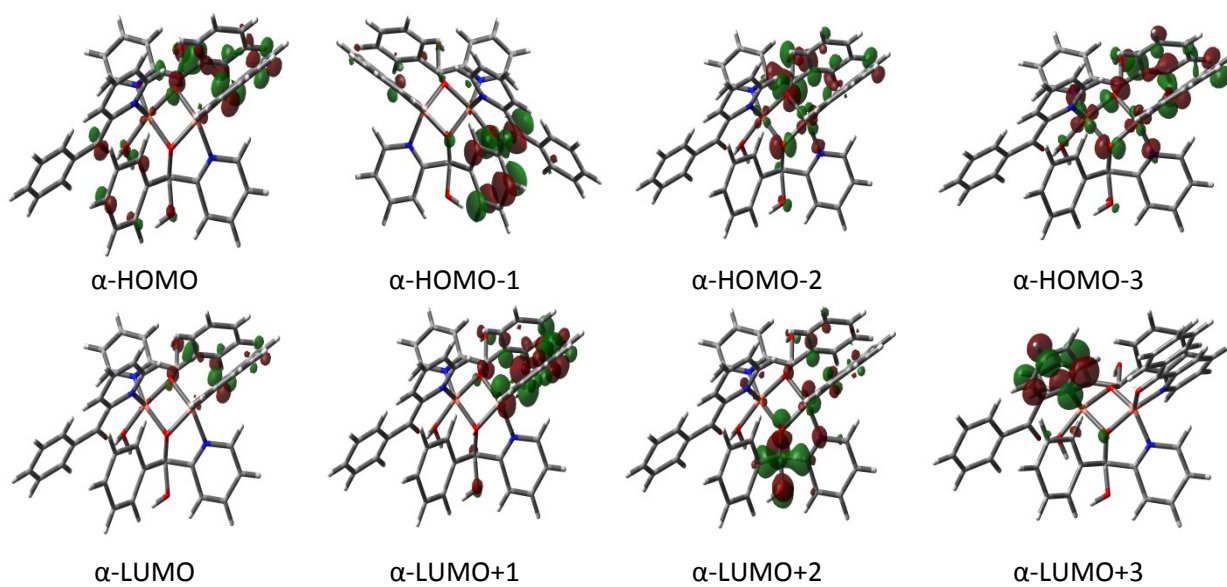

(b)

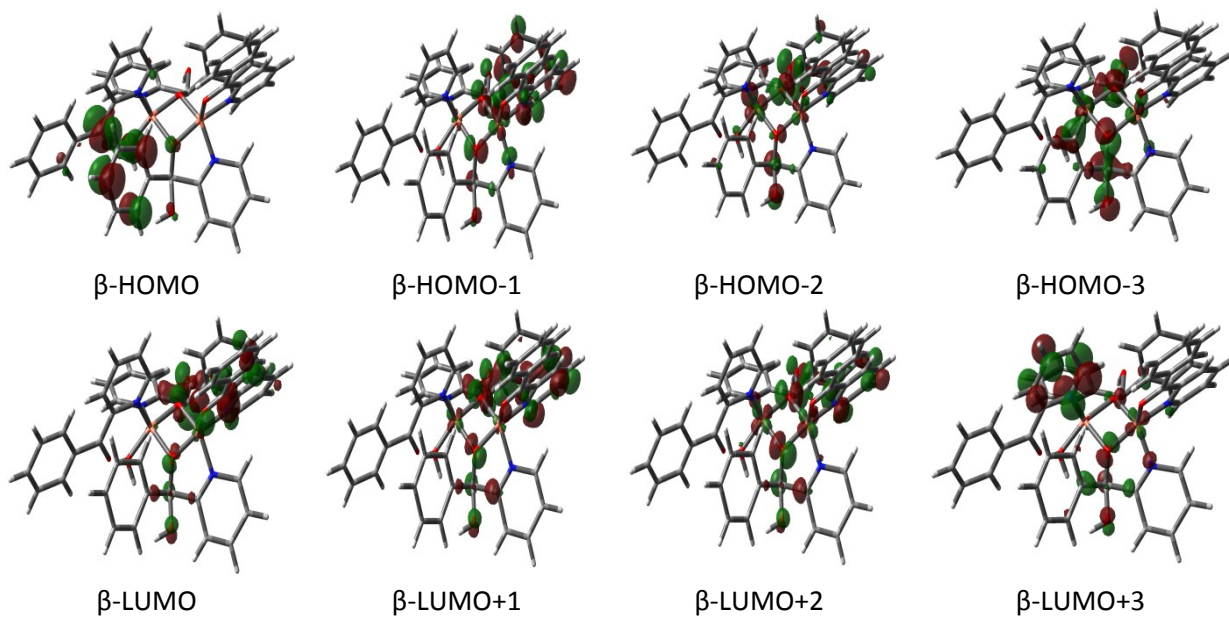

Fig. S3.(a) 3D plot of some selected MOs ( $\alpha$ -spin) of **1** (b) 3D plot of some selected MOs ( $\beta$ -spin) of **1**.

(a)

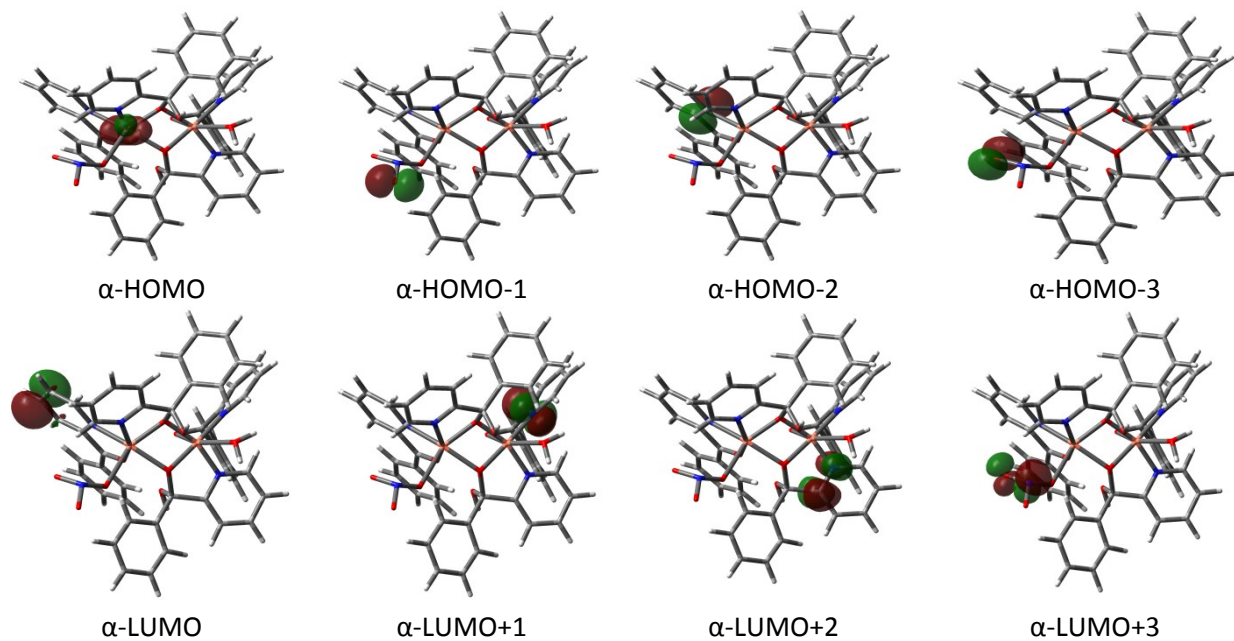



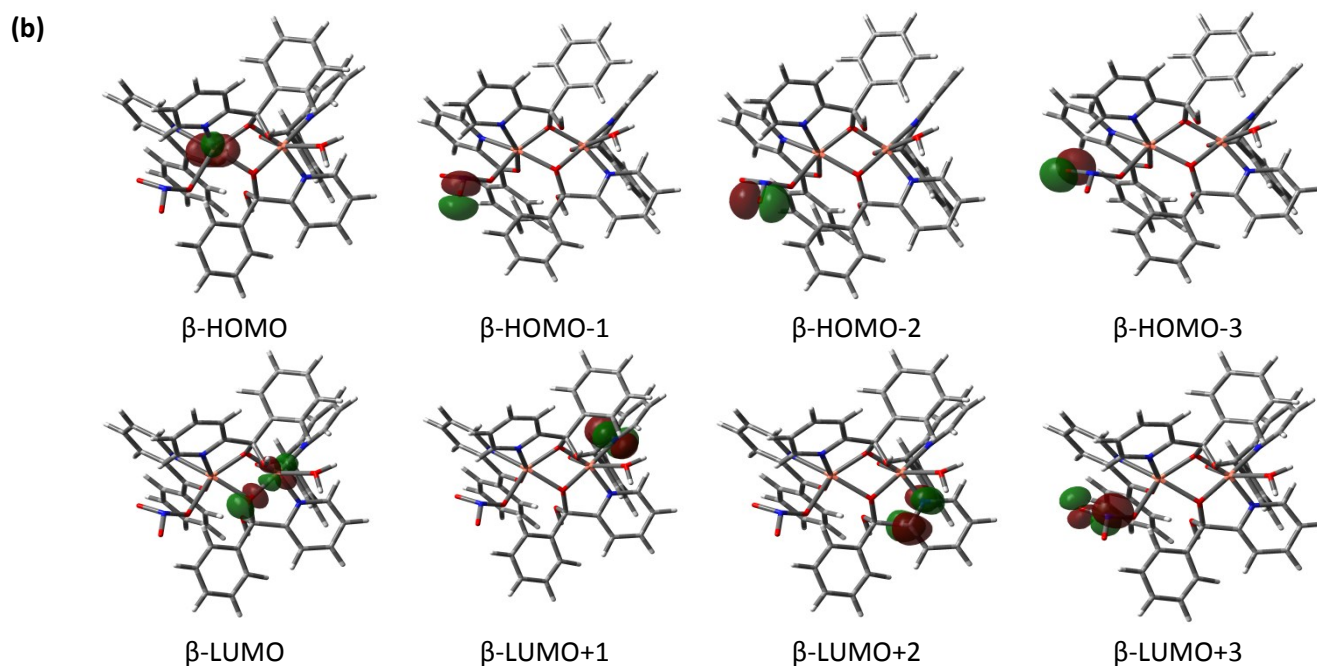

Fig. S4.(a) 3D plot of some selected MOs ( $\alpha$ -spin) of **1** (b) 3D plot of some selected MOs ( $\beta$ -spin) of **2**.

Table S1 Computed and experimental infrared frequencies for compounds **1** and **2**

| Vibration                 | Complex <b>1</b> ( $\text{cm}^{-1}$ ) |              | Complex <b>2</b> ( $\text{cm}^{-1}$ ) |
|---------------------------|---------------------------------------|--------------|---------------------------------------|
|                           | Computed                              | Experimental | Experimental                          |
| $\nu(\text{OH}_2)$ free   | 3370                                  | 3379         | 3421                                  |
| $\nu(\text{OH}_2)$ bonded | 3180                                  | 3214         |                                       |
| $\nu(\text{C-OH})$        | 3078                                  | 3075         | 3117                                  |
| $\nu(\text{C=O})$         | 1627                                  | 1615         | 1764                                  |
| $\nu(\text{Cu-N})$        | 435                                   | 430          | 425                                   |
| $\nu(\text{Cu-O})$        | 480                                   | 475          | 453                                   |

Table S2. Molecular orbital energies and compositions of some selected orbital's for complex **1**

| Orbital | Energy (eV)    |               | % of Metal     |               | % of ligand    |               |
|---------|----------------|---------------|----------------|---------------|----------------|---------------|
|         | $\alpha$ -spin | $\beta$ -spin | $\alpha$ -spin | $\beta$ -spin | $\alpha$ -spin | $\beta$ -spin |
| LUMO+9  | 1.8545         | 1.7421        | 0              | 0             | 100            | 100           |
| LUMO+8  | 1.6888         | 1.6199        | 2              | 6             | 98             | 94            |
| LUMO+7  | 1.5793         | 1.4787        | 2              | 2             | 98             | 98            |
| LUMO+6  | 1.4727         | 1.3348        | 1              | 28            | 99             | 72            |
| LUMO+5  | 1.3099         | 1.3053        | 0              | 1             | 100            | 99            |
| LUMO+4  | 0.9434         | 0.8814        | 12             | 23            | 88             | 77            |
| LUMO+3  | 0.7627         | 0.6968        | 1              | 21            | 99             | 79            |
| LUMO+2  | 0.5866         | 0.4022        | 13             | 40            | 87             | 60            |
| LUMO+1  | -0.0277        | 0.0223        | 5              | 14            | 95             | 86            |
| LUMO    | -0.7507        | 0.0329        | 2              | 5             | 98             | 95            |
| HOMO    | -1.1067        | -1.2210       | 8              | 1             | 92             | 99            |
| HOMO-1  | -1.2417        | -1.5108       | 3              | 22            | 97             | 78            |
| HOMO-2  | -1.8591        | -1.7690       | 15             | 35            | 85             | 65            |
| HOMO-3  | -2.1268        | -2.5026       | 20             | 40            | 80             | 60            |
| HOMO-4  | -2.3762        | -2.7489       | 28             | 42            | 72             | 58            |
| HOMO-5  | -2.6542        | -3.0828       | 25             | 13            | 75             | 87            |
| HOMO-6  | -3.1135        | -3.1968       | 22             | 24            | 78             | 76            |
| HOMO-7  | -3.1770        | -3.2833       | 18             | 2             | 82             | 98            |
| HOMO-8  | -3.3085        | -3.5555       | 8              | 43            | 92             | 57            |
| HOMO-9  | -3.3563        | -3.7133       | 14             | 38            | 86             | 62            |

Table S3. Molecular orbital energies and compositions of some selected orbital's for complex **2**

| Orbital | Energy (eV)    |               | % of Metal     |               | % of ligand    |               |
|---------|----------------|---------------|----------------|---------------|----------------|---------------|
|         | $\alpha$ -spin | $\beta$ -spin | $\alpha$ -spin | $\beta$ -spin | $\alpha$ -spin | $\beta$ -spin |
| LUMO+9  | -0.1603        | -0.3630       | 0              | 0             | 100            | 100           |
| LUMO+8  | -0.1848        | -0.4666       | 0              | 0             | 100            | 100           |
| LUMO+7  | -0.2844        | -0.5252       | 0              | 0             | 100            | 100           |
| LUMO+6  | -0.3347        | -0.5374       | 0              | 0             | 100            | 100           |
| LUMO+5  | -0.4898        | -0.6816       | 0              | 0             | 100            | 100           |
| LUMO+4  | -0.5262        | -0.7469       | 0              | 0             | 100            | 100           |
| LUMO+3  | -0.9823        | -1.0454       | 0              | 0             | 100            | 100           |
| LUMO+2  | -1.3091        | -1.2917       | 0              | 0             | 100            | 100           |
| LUMO+1  | -1.5720        | -1.8898       | 0              | 0             | 100            | 100           |
| LUMO    | -3.2061        | -2.5035       | 0              | 0             | 100            | 100           |
| HOMO    | -4.6684        | -4.2624       | 100            | 100           | 0              | 0             |
| HOMO-1  | -5.1259        | -4.6908       | 0              | 80            | 100            | 20            |
| HOMO-2  | -5.3077        | -5.1275       | 0              | 0             | 100            | 100           |
| HOMO-3  | -5.3531        | -5.3526       | 0              | 0             | 100            | 100           |
| HOMO-4  | -5.5625        | -5.4593       | 0              | 0             | 100            | 100           |
| HOMO-5  | -5.6146        | -5.6152       | 0              | 0             | 100            | 100           |
| HOMO-6  | -5.6421        | -5.6233       | 0              | 0             | 100            | 100           |
| HOMO-7  | -6.1133        | -6.1539       | 0              | 0             | 100            | 100           |
| HOMO-8  | -6.1643        | -6.1643       | 0              | 0             | 100            | 100           |
| HOMO-9  | -6.3442        | -6.3700       | 0              | 0             | 100            | 100           |
